# Supplementary material for: Impact of Brightness on Choroidal Vascularity Index
Source: MDPI journal article supplement (doi:10.3390/jcm13041020), 2024-02-10

## Supplementary Materials

**Figure S1.** Comparison between luminal choroidal area (LCA) in mm<sup>2</sup> at 8 and 16 brightness levels, obtained selecting manual tracking mode of the total choroidal area (TCA).

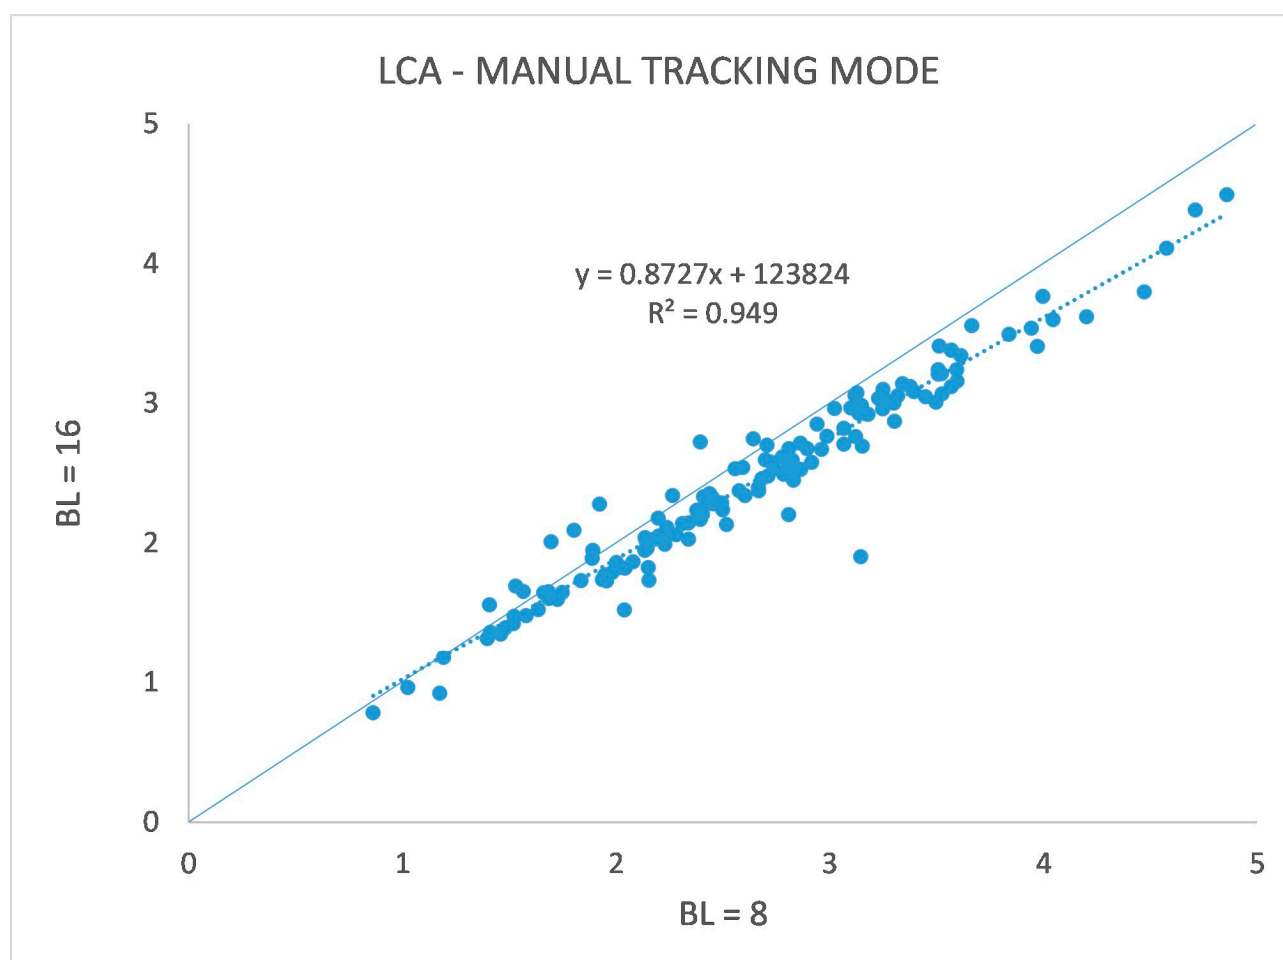

**Figure S2.** Comparison between luminal choroidal area (LCA) in mm<sup>2</sup> at 8 and 16 brightness levels, obtained selecting a fixed total choroidal area (TCA).

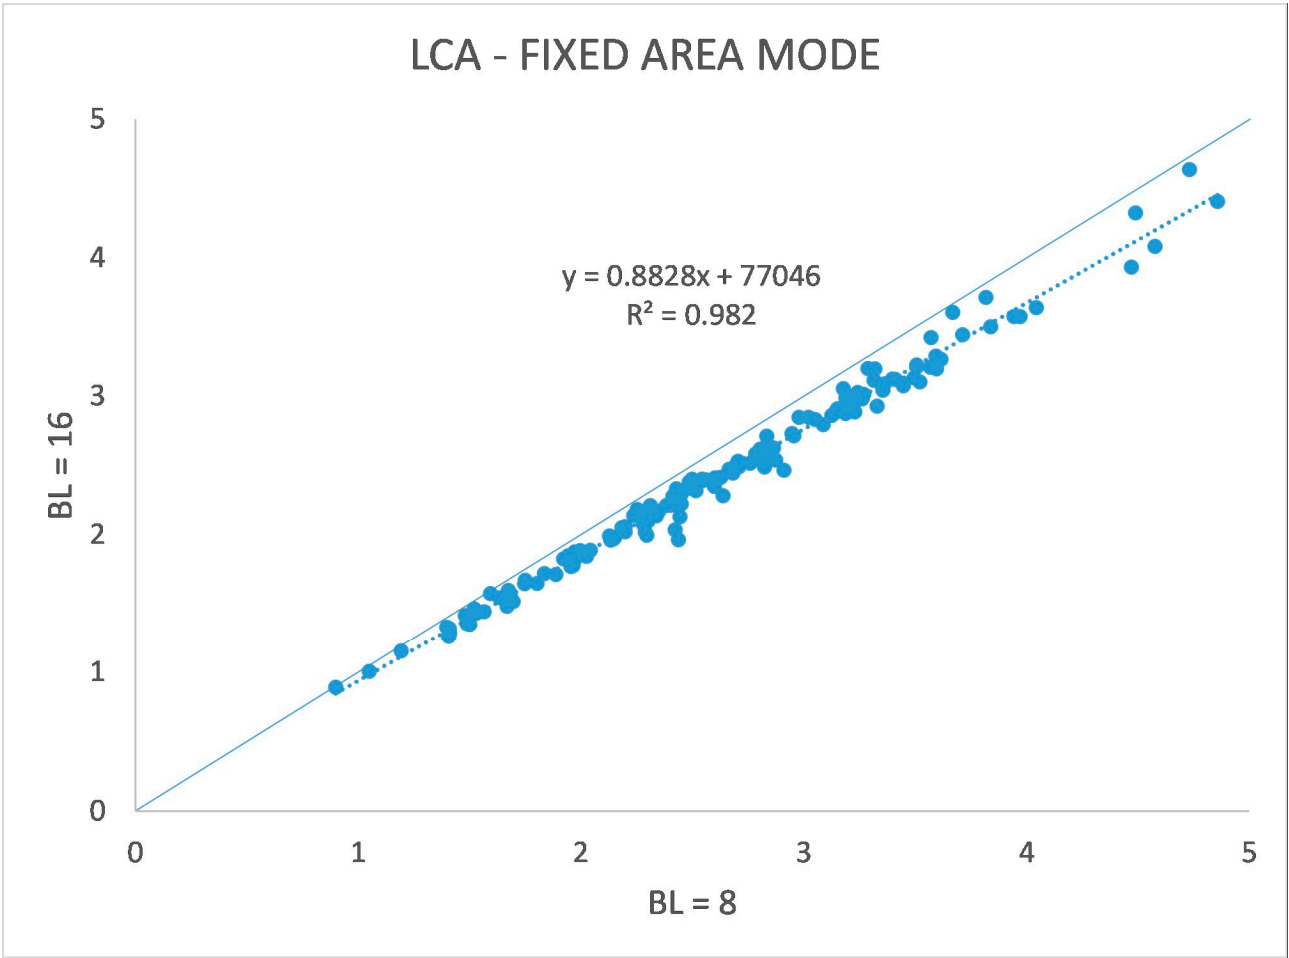

**Figure S3.** Comparison between stromal choroidal area (SCA) in mm<sup>2</sup> at 8 and 16 levels, obtained selecting manual tracking mode of the total choroidal area (TCA).

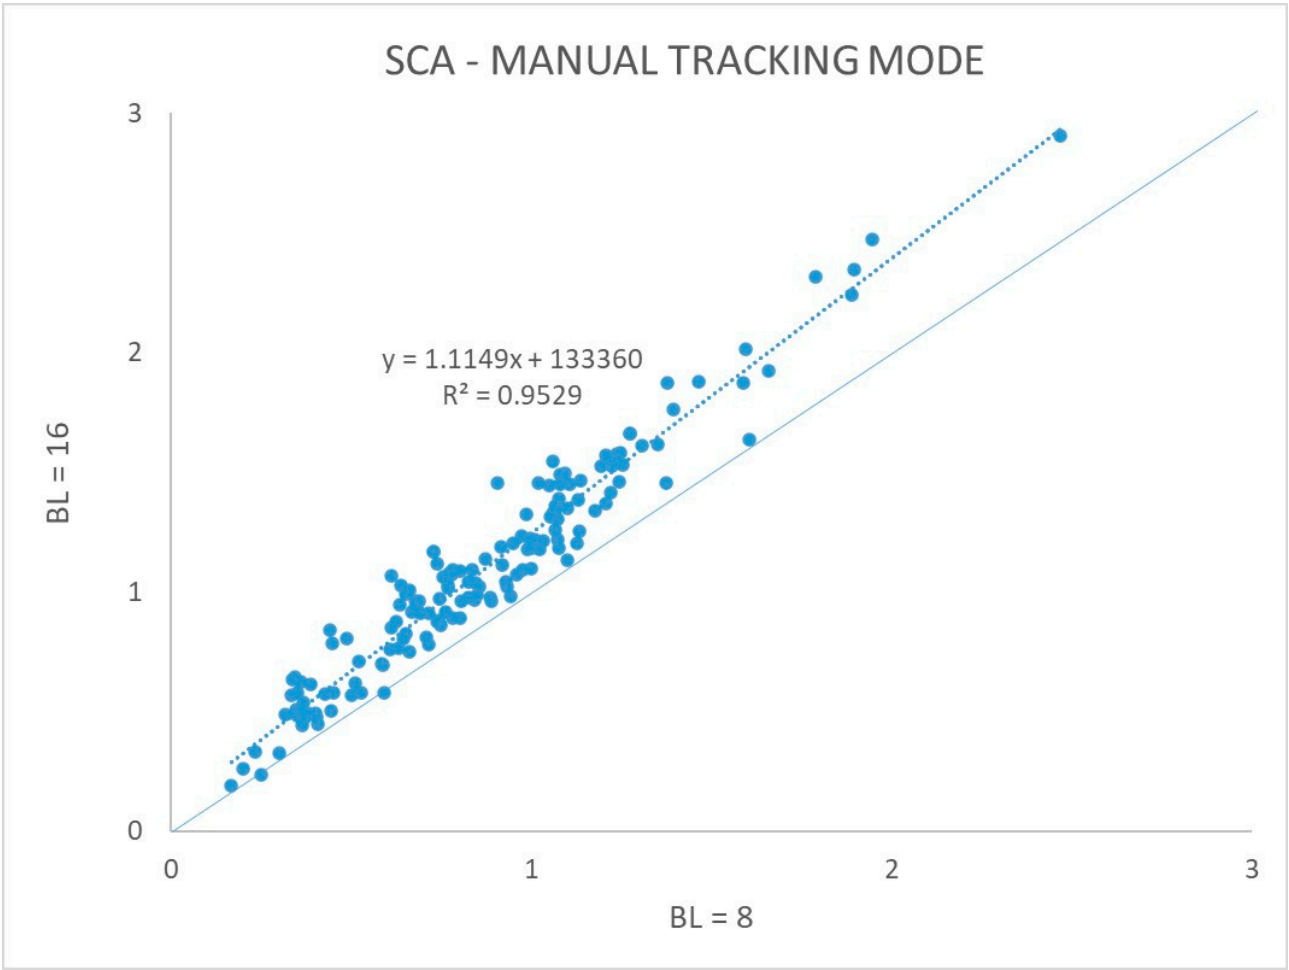

**Figure S4.** Comparison between stromal choroidal area (SCA) in mm<sup>2</sup> at 8 and 16 brightness levels, obtained selecting a fixed total choroidal area (TCA).

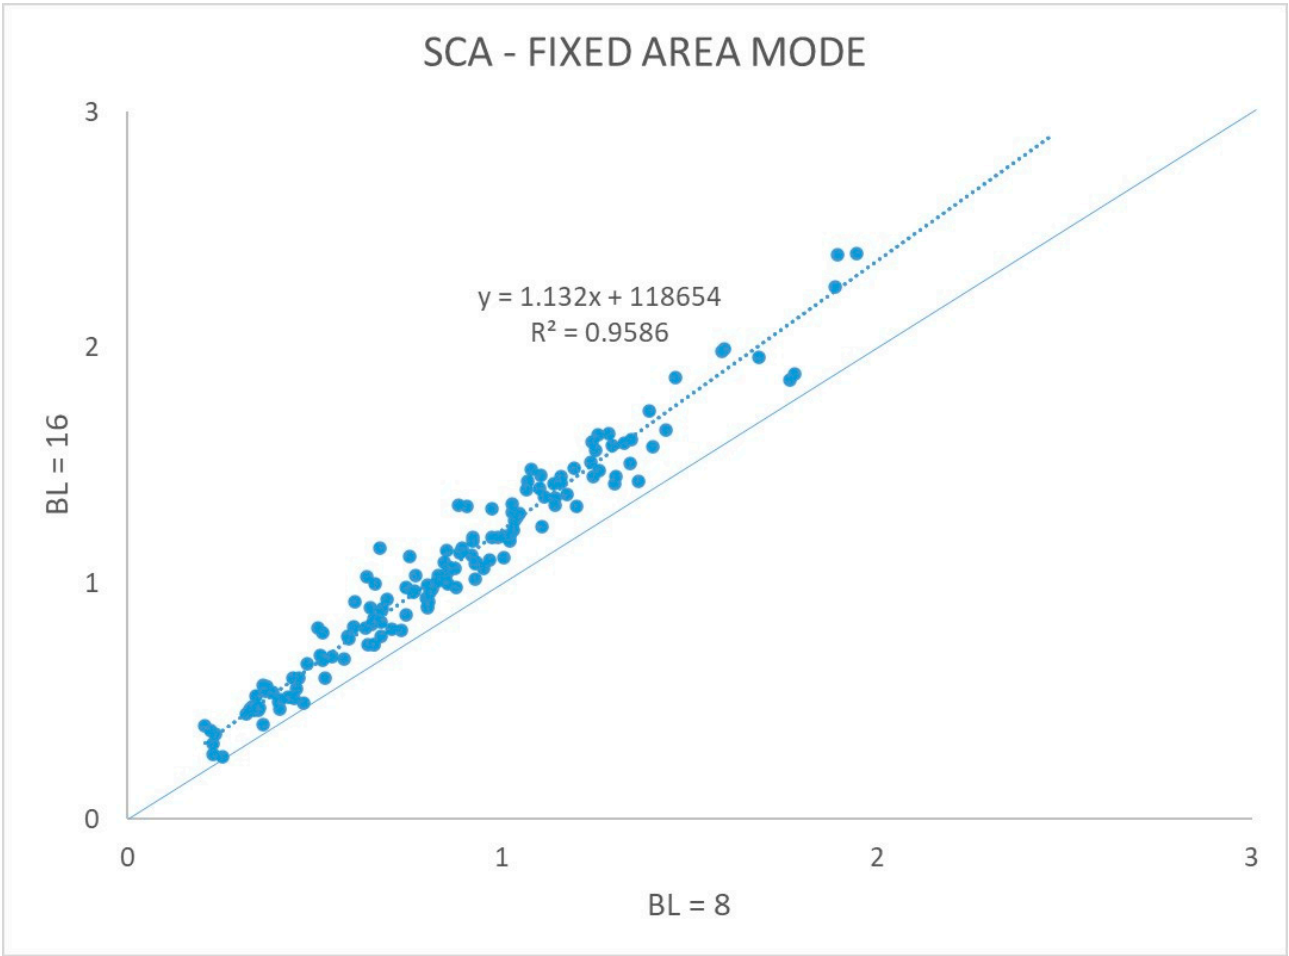

**Figure S5.** Comparison between CVI at 8 and 16 brightness levels, obtained selecting total choroidal area (TCA) manual tracking mode.

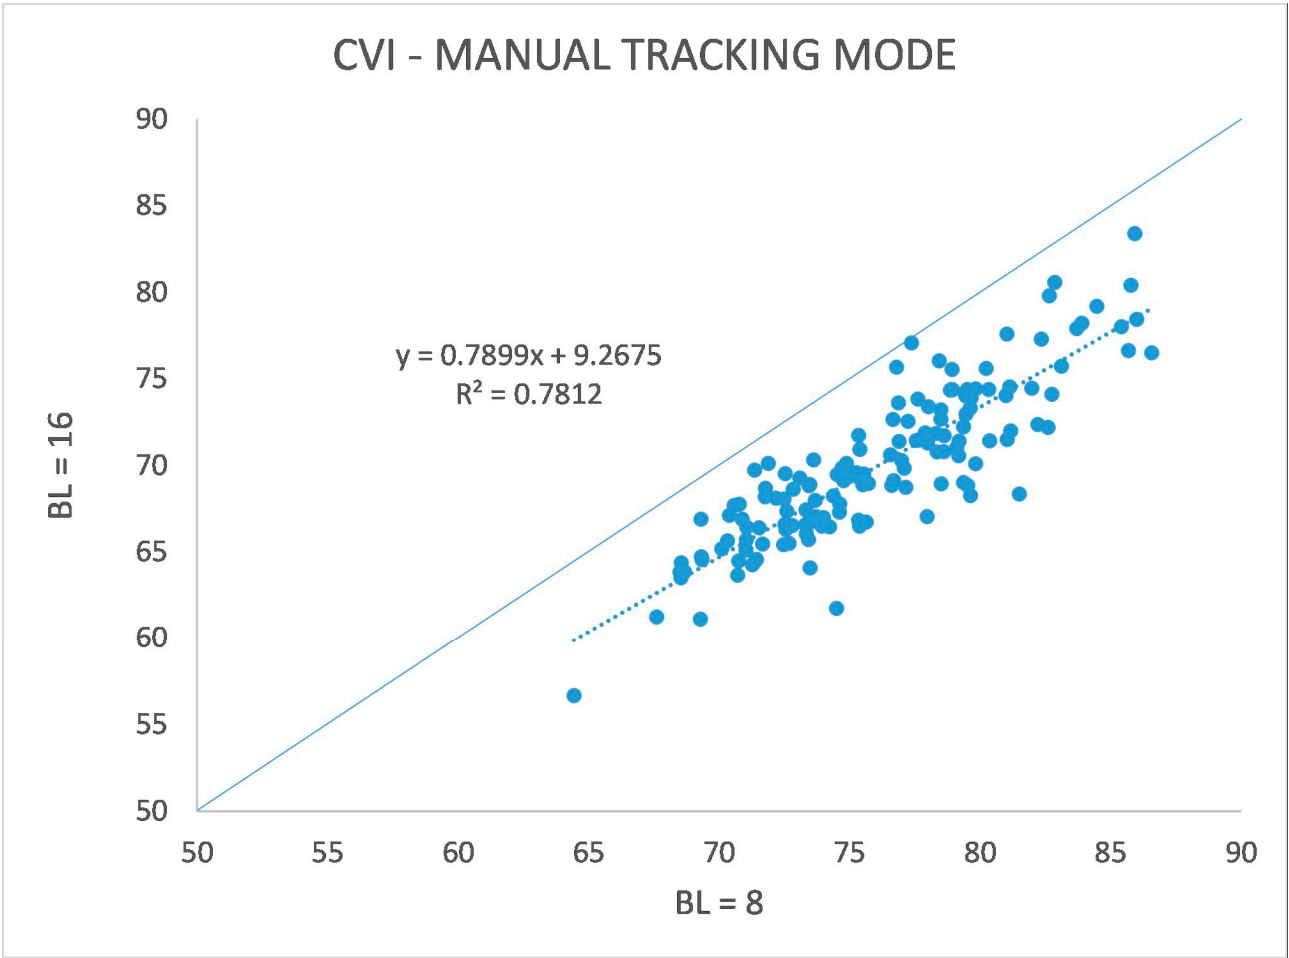

**Figure S6.** Comparison between CVI at 8 and 16 brightness levels, obtained selecting a fixed total choroidal area (TCA).

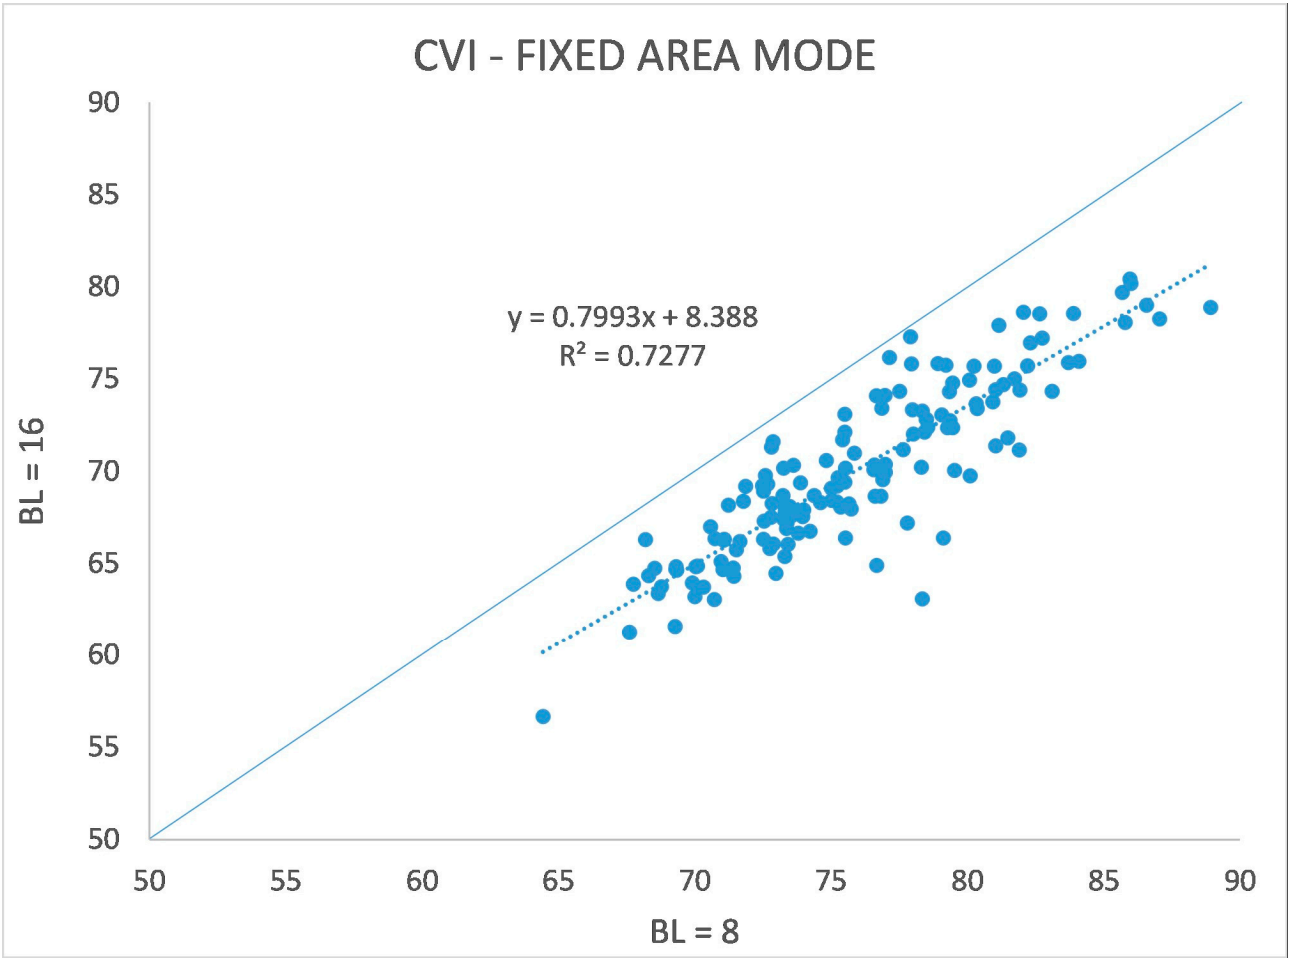

**Figure S7.** Comparison between total choroidal area (TCA) in mm<sup>2</sup> at 8 and 16 brightness levels, obtained selecting TCA manual tracking mode.

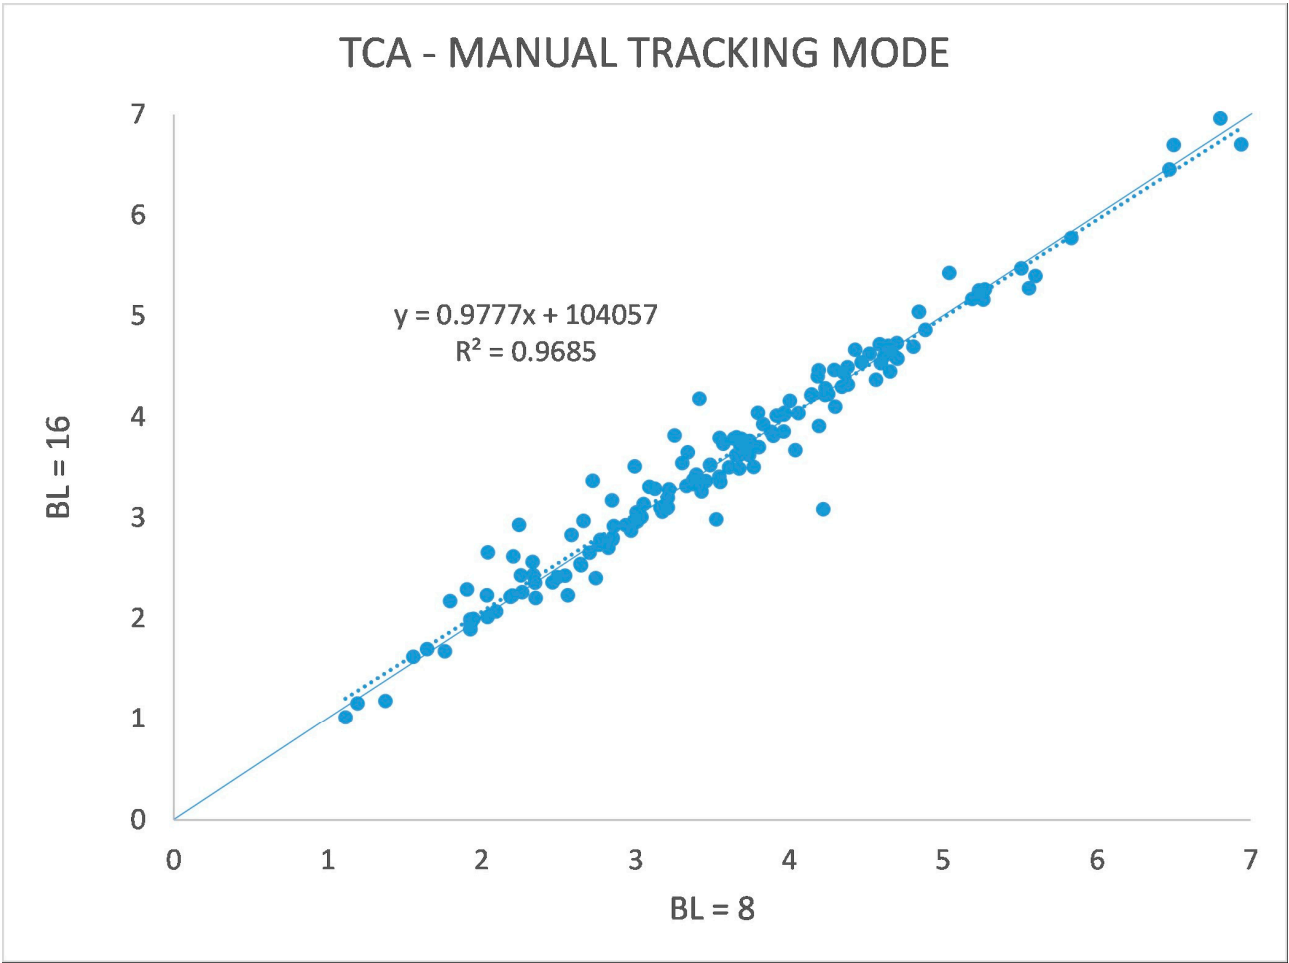

**Figure S8.** Comparison between total choroidal area (TCA) in mm<sup>2</sup> at 8 and 16 brightness levels, obtained selecting a fixed TCA area.

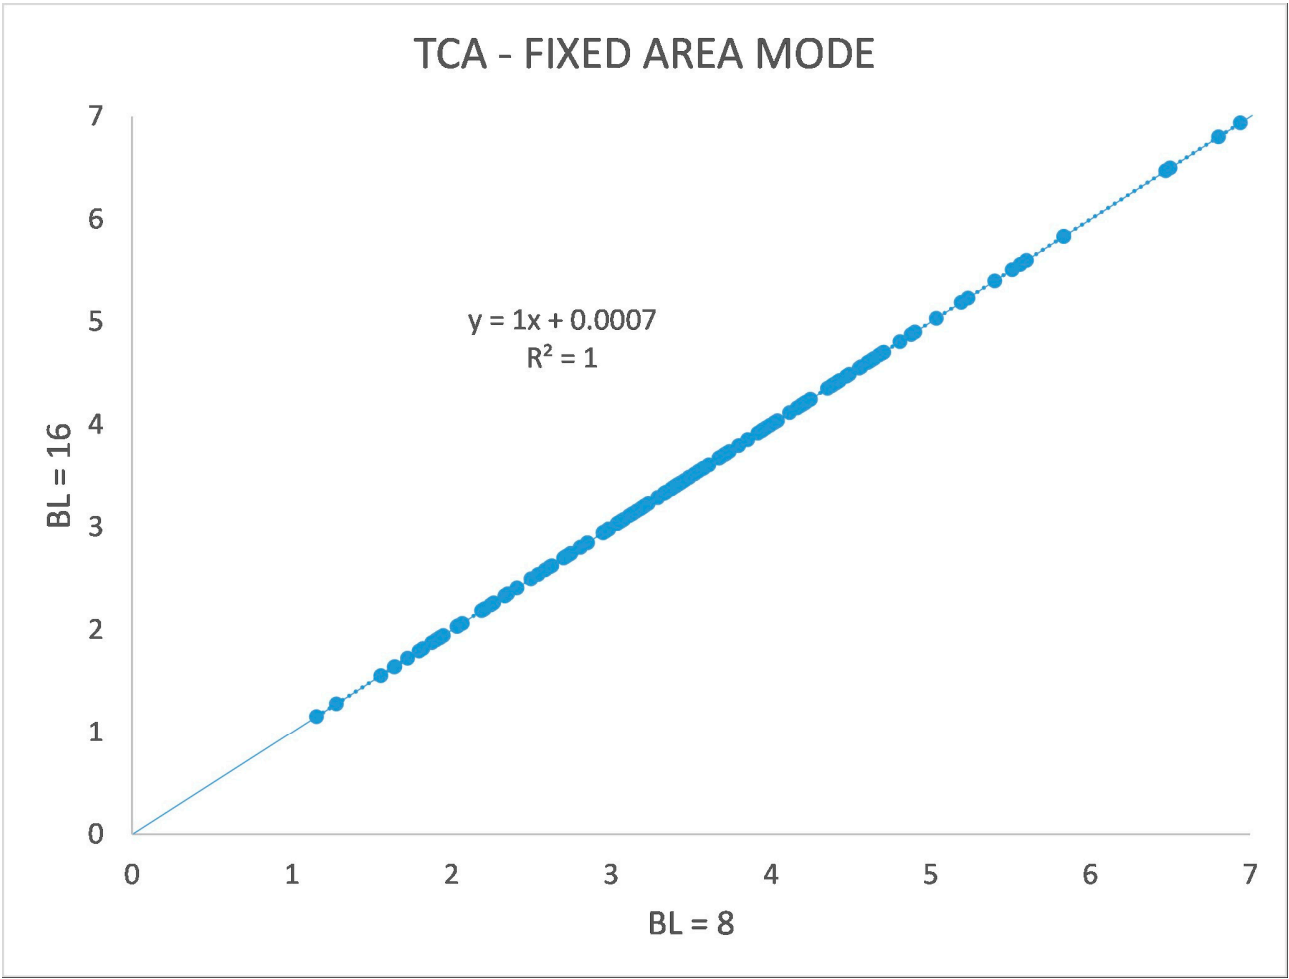

Supplement: s1 [file s1]
